# Supplementary material
Source: Springer Nature journal article supplement (https://www.springermedizin.de/resource/supplementary/13075_2011_3538_MOESM5_ESM.pdf/9694642)

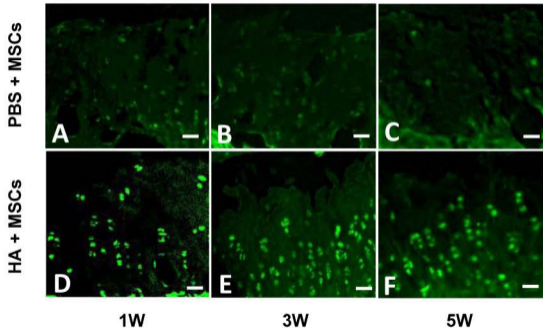

**G**

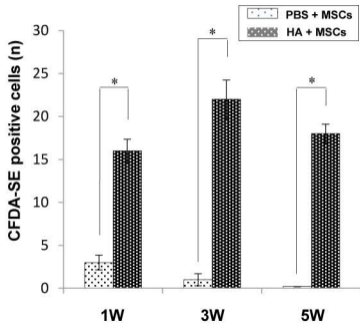

Supplement: MOESM5 [file 9694642]
